# Supplementary material for: Thiostannylation of arynes with stannyl sulfides: synthesis and reaction of 2-(arylthio)arylstannanesElectronic supplementary information (ESI) available: experimental section. See http://www.rsc.org/suppdata/cc/b4/b405883f/
Source: Royal Society of Chemistry journal article supplement (doi:10.1039/b405883f), 2004-01-01
Supplement: b405883f.doc [file b405883f.doc]

Thiostannylation of arynes with stannyl sulfides: synthesis and reaction of 2-(arylthio)arylstannanes

**Hiroto Yoshida,* Tsuguaki Terayama, Joji Ohshita, and Atsutaka Kunai***

*Department of Applied Chemistry, Graduate School of Engineering, Hiroshima University, Higashi-Hiroshima 739-8527, Japan.*

*E-mail: yhiroto@hiroshima-u.ac.jp, akunai@hiroshima-u.ac.jp*

**Supplementary Information**

**General Remarks.** All manipulations of oxygen- and moisture-sensitive materials were conducted with a standard Schlenk technique under a purified argon atmosphere. Nuclear magnetic resonance spectra were taken on a JEOL EX-270 (1H, 270 MHz; 13C, 67.8 MHz) spectrometer or a JEOL Lambda-400 (1H, 400 MHz; 13C, 99.5 MHz; 119Sn, 147.5 MHz) spectrometer using residual chloroform (1H) or CDCl3 (13C) as an internal standard and tetramethyltin (119Sn) as an external standard. The preparative recycling gel permeation chromatography was performed with GL Science PU 614 equipped with Shodex GPC H-2001L and -2002L columns (chloroform as an eluent). Column chromatography was carried out using Merck Aluminium oxide 90, activated, neutral. Unless otherwise noted, commercially available reagents were used without purification. 18-Crown-6 was recrystallized from distilled MeCN. KF (spray-dried) was vacuum dried at 100 °C for 12 h. THF was distilled from sodium/benzophenone ketyl. MeCN was distilled from phosphorus pentoxide.

**Aryne Precursors.** 2-(Trimethylsilyl)phenyl triflate (**1a**),[[1]](#endnote-2) 4,5-dimethyl-2-(trimethylsilyl)phenyl triflate (**1b**),[[2]](#endnote-3) 6-(trimethylsilyl)-5-indanyl triflate (**1c**),2 3,6-dimethoxy-2-(trimethylsilyl)phenyl triflate (**1f**),2 4-methyl-2-(trimethylsilyl)phenyl triflate (**1h**),[[3]](#endnote-4) 4-phenyl-2-(trimethylsilyl)phenyl triflate (**1i**), [[4]](#endnote-5) 4-methoxy-2-(trimethylsilyl)phenyl triflate (**1j**),4 3-methoxy-2-(trimethylsilyl)phenyl triflate (**1l**),[[5]](#endnote-6) 6-phenyl-2-(trimethylsilyl)phenyl triflate (**1m**)[[6]](#endnote-7) and 6-methyl-2-(trimethylsilyl)phenyl triflate (**1n**)4 were prepared according to literature procedures. 3-(Trimethylsilyl)-5,6,7,8-tetrahydro-2-naphthyl triflate (**1d**), 3-(trimethylsilyl)-2-naphthyl triflate (**1e**) and 3,6-dimethyl-2-(trimethylsilyl)phenyl triflate (**1g**) were synthesized from 3-iodo-5,6,7,8-tetrahydro-2-naphthol, 3-bromo-2-naphthol or 2-bromo-3,6-dimethylphenol in a similar manner as the preparation of **1a**. 2-Iodo-5,6,7,8-tetrahydro-2-naphthol was readily obtained from 5,6,7,8-tetrahydro-2-naphthol via the selective *ortho-*iodination according to a literature procedure.[[7]](#endnote-8) 3-Bromo-2-naphthol was synthesized via the protodemethylation of 3-bromo-2-methoxynaphthalene[[8]](#endnote-9) with hydrobromic acid (2 eq.) in refluxing acetic acid. 2-Bromo-3,6-dimethylphenol was available by the *ortho*-bromination of 2,5-dimethylphenol.[[9]](#endnote-10) 4-Fluoro-2-(trimethylsilyl)phenyl triflate (**1k**) was prepared from 2-bromo-4-fluorophenol (WAKO Chemical) in a similar manner as reported.[[10]](#endnote-11)

**Stannyl sulfides.** All stannyl sulfides were prepared from corresponding thiols and tin chlorides according to a literature method.[[11]](#endnote-12)

**Thiostannylation of Arynes. *A General Procedure.*** To a THF solution (1.0 mL) of an aryne precursor (0.30 mmol), a stannyl sulfide (0.20 mol) and 18-crown-6 (0.079 g, 0.30 mmol) was added KF (0.017 g, 0.30 mmol), and the resulting mixture was stirred at 0 °C. After the time specified in Table 1 or Scheme 1, the mixture was diluted with ethyl acetate, filtered through a Celite plug, and concentrated. Alumina column chromatography (hexane as an eluent, Activity IV) followed by gel permeation chromatography (chloroform as an eluent) gave the corresponding product.

**Tributyl[2-(phenylthio)phenyl]tin (3aa).** Isolated in 54% yield as a colorless oil: 1H NMR (CDCl3) 0.85 (t, *J* = 7.3 Hz, 9 H), 1.02-1.08 (m, 6 H), 1.19-1.32 (sext, *J* = 7.9 Hz, 6 H), 1.44-1.54 (m, 6 H), 7.07-7.18 (m, 3 H), 7.20-7.32 (m, 4 H), 7.36-7.46 (m, 1 H), 7.47-7.54 (m, 1 H);13C NMR (CDCl3) 10.8, 13.7, 27.4, 29.1, 125.8, 127.3, 128.2, 128.9, 129.3, 133.9, 137.4, 138.7, 141.8, 149.8; 119Sn NMR (CDCl3)  -42.2; Anal. Calcd for C24H36SSn: C, 60.64; H, 7.63. Found: C, 60.74; H, 7.71.

**Tributyl[4,5-dimethyl-2-(phenylthio)phenyl]tin (3ba).** Isolated in 58% yield as a colorless oil: 1H NMR (CDCl3) 0.85 (t, *J* = 7.4 Hz, 9 H), 0.95-1,06 (m, 6 H), 1.19-1.34 (sext, *J* = 7.3 Hz, 6 H), 1.40-1.60 (m, 6 H), 2.22 (s, 3 H), 2.29 (s, 3 H), 7.03-7.36 (m, 7 H);13C NMR (CDCl3) 10.7, 13.7, 19.5, 19.6, 27.4, 29.1, 125.1, 127.0, 128.7, 136.0, 136.5, 137.6, 138.1, 138.7, 139.8, 147.3; 119Sn NMR (CDCl3)  -43.9; Anal. Calcd for C26H40SSn: C, 62.04; H, 8.01. Found: C, 62.29; H, 8.02.

**Tributyl[6-(phenylthio)-5-indanyl]tin (3ca).** Isolated in 58% yield as a pale yellow oil:1H NMR (CDCl3) 0.78 (t, *J* = 7.3 Hz, 9 H), 0.92-0.98 (m, 6 H), 1.20 (sext, *J* = 7.3 Hz, 6 H), 1.36-1.50 (m, 6 H), 2.02 (quint, *J* = 7.4 Hz, 2 H), 2.83 (tt, *J* = 7.49, 7.37 Hz, 4 H), 6.98-7.08 (m, 3 H), 7.10-7.20 (m, 2 H), 7.25-7.33 (m, 2 H);13C NMR (CDCl3) 10.8, 13.7, 25.3, 27.4, 29.1, 32.6, 32.7, 125.2, 127.3, 128.7, 130.9, 133.2, 137.9, 139.8, 144.3, 146.2, 147.5; 119Sn NMR (CDCl3)  -43.3; Anal. Calcd for C27H40SSn: C, 62.92; H, 7.82. Found: C, 63.20; H, 7.83.

**Tributyl[3-(phenylthio)-5,6,7,8-tetrahydro-2-naphthyl]tin (3da).** Isolated in 52% yield as a colorless oil: 1H NMR (CDCl3) 0.67-1.09 (m, 15 H), 1.23 (sept, *J* = 7.3 Hz, 6 H), 1.32-1.59 (m, 6 H), 1.62-1.90 (m, 4 H), 2.56-2.86 (m, 4 H), 6.96-7.30 (m, 7 H);13C NMR (CDCl3) 10.7, 13.7, 23.0, 23.1, 27.4, 29.1, 125.1, 127.1, 128.7, 135.6, 137.0, 137.2, 138.4, 138.8, 139.8, 146.7; 119Sn NMR (CDCl3)  -43.9; Anal. Calcd for C28H42SSn: C, 63.52; H, 8.00. Found: C, 63.52; H, 7.98.

**Tributyl[3-(phenylthio)-2-naphthyl]tin (3ea).** Isolated in 62% yield as a yellow oil: 1H NMR (CDCl3) 0.88 (t, *J* = 7.3 Hz, 9 H), 1.05-1.18 (m, 6 H), 1.31 (sext, *J* = 7.3 Hz, 6 H), 1.45-1.62 (m, 6 H), 7.10-7.30 (m, 5 H), 7.40-7.56 (m, 2 H), 7.64-7.74 (m, 1 H), 7.76-7.94 (m, 2 H), 7.99 (s, 1 H);13C NMR (CDCl3) 10.9, 13.7, 27.4, 29.1, 126.0, 126.25, 126.33, 127.3, 127.4, 128.5, 129.0, 132.3, 132.4, 134.0, 137.7, 138.4, 138.9, 146.4; 119Sn NMR (CDCl3)  -39.3; Anal. Calcd for C28H38SSn: C, 64.01; H, 7.29. Found: C, 64.02; H, 7.19.

**Tributyl[3,6-dimethoxy-2-(phenylthio)phenyl]tin (3fa).** Isolated in 61% yield as a pale yellow oil: 1H NMR (CDCl3) 0.83 (t, *J* = 7.3 Hz, 9 H), 0.90-1.10 (m, 6 H), 1.23 (sext, *J* = 7.5 Hz, 6 H), 1.40-1.67 (m, 6 H), 3.68 (s, 3 H), 3.75 (s, 3 H), 6.80-6.92 (m, 2 H), 6.96 (d, *J* = 7.9 Hz, 2 H), 7.04 (t, *J* = 7.1 Hz, 1 H), 7.16 (t, *J* = 6.2 Hz, 2 H);13C NMR (CDCl3) 13.0, 13.7, 27.4, 29.1, 55.7, 56.4, 111.1, 112.2, 124.4, 125.4, 127.7, 128.4, 139.1, 142.8, 155.0, 158.3; 119Sn NMR (CDCl3)  -44.4; Anal. Calcd for C26H40O2SSn: C, 58.33; H, 7.53. Found: C, 58.29; H, 7.54.

**Tributyl[3,6-dimethyl-2-(phenylthio)phenyl]tin (3ga).** Isolated in 45% yield as a colorless oil: 1H NMR (CDCl3) 0.81 (t, *J* = 7.1 Hz, 9 H), 0.90-1.07 (m, 6 H), 1.21 (sext, *J* = 7.3 Hz, 6 H), 1.32-1.58 (m, 6 H), 2.26 (s, 3 H), 2.42 (s, 3 H), 6.86 (d, *J* = 7.3 Hz, 2 H), 7.00-7.10 (m, 1 H), 7.11-7.24 (m, 4 H);13C NMR (CDCl3) 13.6, 14.1, 21.5, 25.3, 27.4, 29.1, 124.5, 125.1, 128.7, 130.8, 131.0, 138.5, 139.1, 140.3, 144.4, 154.5; 119Sn NMR (CDCl3)  -53.4; Anal. Calcd for C26H40SSn: C, 62.04; H, 8.01. Found: C, 62.00; H, 8.09.

**Tributyl[2-(4-methoxyphenylthio)phenyl]tin (3ab).** Isolated in 49% yield as a colorless oil: 1H NMR (CDCl3) 0.89 (t, *J* = 7.6 Hz, 9 H), 1.00-1.25 (m, 6 H), 1.33 (sext, *J* = 7.3 Hz, 6 H), 1.40-1.75 (m, 6 H), 3.80 (s, 3 H), 6.75-7.00 (m, 2 H), 7.05-7.32 (m, 5 H), 7.35-7.55 (m, 1 H);13C NMR (CDCl3) 10.8, 13.7, 27.4, 29.1, 55.3, 114.8, 126.0, 127.5, 129.1, 130.7, 132.7, 136.9, 145.1, 146.1, 159.0; 119Sn NMR (CDCl3)  -41.3; Anal. Calcd for C25H38OSSn: C, 59.42; H, 7.58. Found: C, 59.43; H, 7.56.

**Tributyl[2-(2-methylphenylthio)phenyl]tin (3ac).** Isolated in 39% yield as a yellow oil: 1H NMR (CDCl3) 0.86 (t, *J* = 7.3 Hz, 9 H), 0.95-1.18 (m, 6 H), 1.28 (sext, *J* = 7.4 Hz, 6 H), 1.37-1.70 (m, 6 H), 2.39 (s, 3 H), 6.90 (d, *J* = 7.5 Hz, 2 H), 7.00-7.13 (m, 2 H), 7.17-7.28 (m, 3 H), 7.40-7.60 (m, 1 H);13C NMR (CDCl3) 10.7, 13.6, 20.3, 27.4, 29.1, 126.1, 126.5, 126.8, 128.9, 129.3, 130.1, 132.7, 136.7, 137.1, 137.4, 141.9, 148.8; 119Sn NMR (CDCl3)  -41.9; Anal. Calcd for C25H38SSn: C, 61.36; H, 7.83. Found: C, 61.31; H, 7.83.

**Trimethyl[2-(phenylthio)phenyl]tin (3ad).** Isolated in 56% yield as a colorless oil: 1H NMR (CDCl3) 0.28 (s, 9 H), 7.06-7.17 (m, 3 H), 7.20-7.27 (m, 2 H), 7.28-7.36 (m, 2 H), 7.38-7.50 (m, 1 H), 7.55-7.58 (m, 1 H);13C NMR (CDCl3) -7.9, 125.8, 127.5, 128.2, 128.9, 129.7, 134.2, 136.8, 138.6, 141.7, 149.9; 119Sn NMR (CDCl3)  -33.1; Anal. Calcd for C15H18SSn: C, 51.61; H, 5.20. Found: C, 51.78; H, 5.24.

**A mixture of tributyl[5-methyl-2-(phenylthio)phenyl]tin (3ha) and tributyl[4-methyl-2-(phenylthio)phenyl]tin (3’ha).** Isolated in 63% yield as a colorless oil: 1H NMR (CDCl3) 0.85 (t, *J* = 7.3 Hz, 18 H), 0.93-1.15 (m, 12 H), 1.27 (sext, *J* = 7.3 Hz, 12 H), 1.40-1.60 (m, 12 H), 2.30 (s, 3 H), 2.37 (s, 3 H), 7.00-7.47 (m, 16 H);13C NMR (CDCl3) 10.8, 13.7, 21.1, 21.3, 27.4, 29.1, 125.3, 125.6, 127.2, 127.9, 128.5, 128.79, 128.84, 130.4, 134.7, 134.8, 137.3, 137.6, 138.2, 139.0, 139.3, 139.6, 141.3, 146.0, 150.5; 119Sn NMR (CDCl3)  -43.4, -42.4; Anal. Calcd for C25H38SSn: C, 61.36; H, 7.83. Found: C, 61.36; H, 7.82. .

**A mixture of tributyl[5-phenyl-2-(phenylthio)phenyl]tin (3ia) and tributyl[4-phenyl-2-(phenylthio)phenyl]tin (3’ia).** Isolated in 52% yield as a colorless oil:1H NMR (CDCl3) 0.88 (t, *J* = 7.4 Hz, 18 H), 1.00-1.24 (m, 12 H), 1.31 (sext, *J* = 7.3 Hz, 12 H), 1.43-1.75 (m, 12 H), 7.10-7.90 (m, 26 H);13C NMR (CDCl3) 10.9, 13.7, 27.4, 29.1, 125.8, 125.9, 126.1, 127.0, 127.1, 127.4, 127.5, 128.0, 128.2, 128.3, 128.8, 129.0, 132.4, 134.0, 135.9, 137.8, 138.56, 138.62, 139.8, 140.3, 140.8, 141.0, 142.2, 142.3, 148.5, 150.0; 119Sn NMR (CDCl3)  -41.5, -40.5; Anal. Calcd for C30H40SSn: C, 65.34; H, 7.31. Found: C, 65.50; H, 7.32.

**A mixture of tributyl[5-methoxy-2-(phenylthio)phenyl]tin (3ja) and tributyl[4-methoxy-2-(phenylthio)phenyl]tin (3’ja).** Isolated in 55% yield as a colorless oil: 1H NMR (CDCl3) 0.76-1.65 (m, 54 H), 3.73 (s, 3 H), 3.85 (s, 3 H), 6.80-7.54 (m, 16 H);13C NMR (CDCl3) 10.75, 10.80, 13.6, 27.4, 29.06, 29.11, 55.1, 55.2, 113.8, 114.8, 118.7, 123.0, 124.9, 126.0, 126.1, 128.6, 128.7, 129.0, 130.8, 137.1, 138.1, 138.2, 139.1, 140.5, 143.1, 153.8, 159.2, 160.6; 119Sn NMR (CDCl3)  -41.4; Anal. Calcd for C25H38OSSn: C, 59.42; H, 7.58. Found: C, 59.38; H, 7.70.

**A mixture of tributyl[5-fluoro-2-(phenylthio)phenyl]tin (3ka) and tributyl[4-fluoro-2-(phenylthio)phenyl]tin (3’ka).** Isolated in 21% yield as a yellow oil: 1H NMR (CDCl3) 0.78-1.75 (m, 54 H), 6.83-7.35 (m, 14 H), 7.36-7.60 (m, 2 H);13C NMR (CDCl3) 10.8, 10.9, 13.6, 27.3, 29.0, 29.1, 114.2 (*J*C-F = 19.5 Hz), 116.6 (*J*C-F = 22.0 Hz), 118.9 (*J*C-F = 22.0 Hz), 123.6 (*J*C-F = 18.4 Hz), 125.5, 126.9, 127.2, 128.9, 129.2, 129.9, 136.0 (*J*C-F = 3.7 Hz), 136.6 (*J*C-F = 7.3 Hz), 138.3 (*J*C-F = 7.3 Hz), 139.2, 154.3, 160.7, 164.4; 119Sn NMR (CDCl3)  -39.7 (*J*Sn-F = 10.8 Hz), -39.1 (*J*Sn-F = 5.4 Hz); Anal. Calcd for C24H35FSSn: C, 58.43; H, 7.15. Found: C, 58.59; H, 7.15.

**Tributyl[6-methoxy-2-(phenylthio)phenyl]tin (3la).** Isolated in 62% yield as a colorless oil: 1H NMR (CDCl3) 0.85 (t, *J* = 7.1 Hz, 9 H), 1.02-1.12 (m, 6 H), 1.27 (sext, *J* = 7.3 Hz, 6 H), 1.40-1.56 (m, 6 H), 3.77 (s, 3 H), 6.73 (d, *J* = 7.9 Hz, 1 H), 6.96 (d, *J* = 7.6 Hz, 1 H), 7.08-7.30 (m, 6 H);13C NMR (CDCl3) 12.8, 13.7, 27.4, 29.2, 55.2, 108.2, 125.8, 126.5, 128.7, 128.9, 130.3, 136.9, 138.6, 143.2, 164.6; 119Sn NMR (CDCl3)  -43.1; Anal. Calcd for C25H38OSSn: C, 59.42; H, 7.58. Found: C, 59.40; H, 7.61.

**Tributyl[6-phenyl-2-(phenylthio)phenyl]tin (3ma).** Isolated in 61% yield as a yellow oil: 1H NMR (CDCl3) 0.50-0.74 (m, 6 H), 0.80 (t, *J* = 7.3 Hz, 9 H), 1.15 (sext, *J* = 7.3 Hz, 6 H), 1.24-1.44 (m, 6 H), 7.10-7.50 (m, 13 H);13C NMR (CDCl3) 13.0, 13.6, 27.2, 29.1, 125.7, 127.2, 128.1, 128.2, 128.7, 128.9, 129.1, 132.8, 139.2, 142.8, 145.3, 148.9, 152.4; 119Sn NMR (CDCl3)  -43.6; Anal. Calcd for C30H40SSn: C, 65.34; H, 7.31. Found: C, 65.35; H, 7.30.

**A mixture of tributyl[6-methyl-2-(phenylthio)phenyl]tin (3na) and tributyl[3-methyl-2-(phenylthio)phenyl]tin (3’na).** Isolated in 57% yield as a colorless oil: 1H NMR (CDCl3) 0.75-0.92 (m, 18 H), 0.93-1.02 (m, 6 H), 1.05-1.12 (m, 6 H), 1.15-1.34 (m, 12 H), 1.35-1.60 (m, 12 H), 2.31 (s, 3 H), 2,44 (s, 3 H), 6.84-6.94 (m, 2 H), 7.00-7.50 (m, 14 H);13C NMR (CDCl3) 11.0, 13.7, 13.8, 21.7, 25.7, 27.4, 29.1, 29.2, 124.6, 125.2, 125.4, 127.4, 128.75, 128.82, 129.1, 129.2, 131.1, 132.2, 135.2, 138.4, 138.8, 139.6, 141.6, 143.3, 146.8, 150.5, 154.4; 119Sn NMR (CDCl3)  -48.0, -46.3; Anal. Calcd for C25H38SSn: C, 61.36; H, 7.83. Found: C, 61.33; H, 7.83.

**Cross-coupling of 3aa with 4-iodonitrobenzene.** A DMF solution (1 mL) of **3aa** (0.045 g, 0.095 mmol) and 4-iodonitrobenzene (0.035 g, 0.14 mmol) was degassed by two freeze-thaw cycles. To this solution were added CuI (0.014 g, 0.071 mmol) and Pd(PPh3)4 (0.011g, 9.5 mol), and the mixture was stirred at 50 °C for 16 h before the removal of the solvent in vacuo. The residue was diluted with ethyl acetate, and the resulting mixture was treated with a 1 M KF aqueous solution at room temperature for 2 h. After insoluble materials were filtered through a Celite pad, the organic layer was dried over MgSO4. Evaporation of the solvent followed by GPC gave 4-nitro-2’-(phenylthio)biphenyl (**4a**) as a yellow oil: 1H NMR (CDCl3) 7.12-7.40 (m, 9 H), 7.54 (d, *J* = 8.9 Hz, 2 H), 8.22 (d, *J* = 8.9 Hz, 2 H); 13C NMR (CDCl3) 123.1, 127.3, 127.5, 129.16, 129.22, 130.3, 131.1, 132.4, 134.5, 135.1, 141.2, 147.1, 147.3; HRMS Calcd for C18H13NO2S: M+, 307.0667. Found: *m*/*z* 307.0735.

**Homocoupling of 3aa.** To a DMSO solution (1 mL) of **3aa** (0.033 g, 0.069 mmol) were added CuCl (6.8 mg, 0.069 mmol), CuCl2 (9.3 mg, 0.069 mmol) and Pd(PPh3)4 (8.0 mg, 6.9 mol), and the mixture was stirred at 50 °C for 2 h. The reaction mixture was diluted with ether and washed with water before evaporation of the organic layer. The residue was dissolved in ethyl acetate and treated with a 1 M KF aqueous solution at room temperature for 2 h. After insoluble materials were filtered through a Celite pad, the organic layer was dried over MgSO4. Evaporation of the solvent followed by GPC gave 2,2’-bis(phenylthio)biphenyl (**4b**) as a colorless oil: 1H NMR (CDCl3) 7.15-7.35 (m, 18 H); 13C NMR (CDCl3) 126.4, 127.1, 128.5, 129.0, 130.5, 130.9, 132.0, 135.6, 136.3, 141.3; HRMS Calcd for C24H18S2: M+, 370.0850. Found: *m*/*z* 370.0809.

**Iododestannylation of 3aa.** To a CH2Cl2 solution (1 mL) of **3aa** (0.037 g, 0.079 mmol) was added I2 (0.020 g, 0.079 mmol) at room temperature, and the resulting mixture was stirred for 4 h before ethyl acetate and a saturated Na2S2O3 aqueous solution were added. After the organic layer was treated with a 1 M KF aqueous solution at room temperature for 30 min, insoluble materials were filtered through a Celite pad, and the organic layer was dried over MgSO4. Evaporation of the solvent followed by GPC gave 2-iodophenyl phenyl sulfide (**4c**) (0.018 g, 75%) as a brown solid: 1H NMR (CDCl3) 6.82-6.92 (m, 1 H), 6.93-6.99 (m, 1 H), 7.15-7.24 (m, 1 H), 7.30-7.48 (m, 5 H), 7.80-7.88 (m, 1 H); 13C NMR (CDCl3) 99.3, 127.4, 128.3, 128.7, 129.4, 129.6, 133.1, 133.8, 139.6, 142.2; Anal. Calcd for C12H9IS: C, 46.17; H, 2.91. Found: C, 46.30; H, 2.95.

1. Y. Himeshima, T. Sonoda and H. Kobayashi, *Chem. Lett.,* 1983, 1211–1214. [↑](#endnote-ref-2)
2. H. Yoshida, S. Sugiura and A. Kunai, *Org. Lett.,* 2002, **4**, 2767–2769. [↑](#endnote-ref-3)
3. E. Yoshikawa, K. V. Radhakrishnan and Y. Yamamoto, *J. Am. Chem.* *Soc.,* 2000, **122**, 7280–7286. [↑](#endnote-ref-4)
4. H. Yoshida, J. Ikadai, M. Shudo, J. Ohshita and A. Kunai, *J. Am. Chem.* *Soc.,* 2003, **125**, 6638–6639. [↑](#endnote-ref-5)
5. D. Peña, D. Pérez, E. Guitián and L. Castedo, *J. Am. Chem.* *Soc.,* 1999, **121**, 5827–5828. [↑](#endnote-ref-6)
6. H. Yoshida, E. Shirakawa, Y. Honda and T. Hiyama, *Angew. Chem. Int. Ed.,* 2002, **41**, 3247–3249. [↑](#endnote-ref-7)
7. M. R. Winkle and R. C. Ronald, *J. Org. Chem.,* 1982, **47**, 2101–2108. [↑](#endnote-ref-8)
8. R. S. Laufer and G. I. Dmitrienko, *J. Am. Chem. Soc.,* 2002, **124**, 1854–1855. [↑](#endnote-ref-9)
9. S. Fujisaki, H. Eguchi, A. Omura, A. Okamoto and A. Nishida, *Bull. Chem. Soc. Jpn.,* 1993, **66**, 1576–1579. [↑](#endnote-ref-10)
10. D. Peña, A. Cobas, D. Pérez and E. Guitián, *Synthesis,* 2002, 1454–1458. [↑](#endnote-ref-11)
11. S. Sabelle, P. –Y. Renard, K. Pecorella, S. de Suzzoni-Dézard, C. Créminon, J. Grassi and C. Mioskowski, *J. Am. Chem. Soc.,* 2002, **124**, 4874–4880. [↑](#endnote-ref-12)
